# Supplementary material for: Modulation of the enzyme-like activity of CuAsp nanozyme by gallic acid and the selective detection of bisphenol A in infant food packaging
Source: Royal Society of Chemistry journal article supplement (doi:10.1039/d3ay01930f), 2024-01-01
Supplement: d3ay01930f1.pdf [file d3ay01930f1.pdf]

1                   **Electronic Supplementary Material**

2

3                   **Modulation of the enzyme-like activity of CuAsp**  
4 **nanozyme by gallic acid and the selective detection of**  
5 **bisphenol A in infant food packaging**

6

7                   Luwei Wang<sup>a</sup>, Jie Li<sup>a</sup>, Lulu Lei<sup>a</sup>, Yongxin Li<sup>b,\*</sup>, Hui Huang<sup>a,\*</sup>

8

9 <sup>a</sup>College of Food Science and Engineering, Jilin University, Changchun 130062, China.

10 <sup>b</sup>Key Lab of Groundwater Resources and Environment of Ministry of Education, Key  
11 Lab of Water Resources and Aquatic Environment of Jilin Province, College of New  
12 Energy and Environment, Jilin University, Changchun 130021, China.

13

14

15

16

17

18 \*Corresponding author.

19 E-mail address: liyongxin@jlu.edu.cn.

20 E-mail address: huanghui@jlu.edu.cn.

21

22        **Chemicals and Instrumentation.**  $\text{Cu}(\text{NO}_3)_2 \cdot 3\text{H}_2\text{O}$ , L-Aspartic acid (L-Asp),  
23 bisphenol A, L-Glutamic acid (L-Glu), L-Glycine (L-Gly), L-Tyrosine (L-Try),  
24 Glucose, Fructose, Sucrose, 3,3',5,5'-Tetramethylbenzidine (TMB), and N-2-  
25 hydroxyethylpiperazine-N-ethane-sulphonicacid (HEPES) were obtained from  
26 Macklin Co., Ltd. (Shanghai, China). 2,4-dichlorophenol (2,4-DP) and 4-  
27 aminoantipyrine (4-AP) were procured from Aladdin Inc. (Shanghai, China). 2-(N-  
28 Morpholino)ethanesulfonic acid monohydrate (MES) and Tris-(hydroxymethyl)  
29 aminomethane (Tris-HCl) were procured from Sangon Biotechnology Co., Ltd.  
30 (Shanghai, China). Gallic acid (GA), NaCl, KCl,  $\text{CaCl}_2$ ,  $\text{MgCl}_2$ ,  $\text{MnCl}_2$ ,  $\text{NaHCO}_3$ ,  
31  $\text{Na}_2\text{CO}_3$ ,  $\text{Na}_2\text{SO}_4$ , and  $\text{CH}_3\text{COONa}$  were purchased from Xilong Scientific Co., Ltd.  
32 (China). Hydrogen peroxide ( $\text{H}_2\text{O}_2$ , 30%), NaOH,  $\text{CH}_3\text{COOH}$ ,  $\text{Zn}(\text{NO}_3)_2$ ,  $\text{CoCl}_2$ ,  
33  $\text{NiCl}_2$ , NaBr, and Benzoic acid were purchased from Beijing Chemical Works. All  
34 reagents and chemicals utilized in this work were analytical grades.

35        Fourier transform infrared (FTIR) spectra were collected on a Shimadzu  
36 IRPrestige-21 spectrometer (Japan). X-ray photoelectron spectroscopy (XPS) spectra  
37 were obtained using an ESCALAB-250Xi spectrometer (UK). UV-vis spectra and  
38 absorbance were determined with a UV-2550 spectrophotometer (Kyoto, Japan).  
39 Centrifuge HC-2062 (Anhui, China) was used for centrifugal operations in  
40 experiments.

41        **Synthesis of CuAsp.** CuAsp was obtained with reference to previous work and  
42 slightly optimized.<sup>S1</sup> First, 1 mmol of Asp and 3 mmol of sodium hydroxide were

43 dissolved in 10 mL of the aqueous solution, and the aqueous solution of  
44  $\text{Cu}(\text{NO}_3)_2 \cdot 3\text{H}_2\text{O}$  (1.5 mmol, 2 mL) was added to the above mixture at room temperature  
45 and the solution was immediately mixed well with a vortex shaker. Then, the mixture  
46 was centrifuged at 10,000 r/min for 3 min to remove the supernatant, and the resulting  
47 precipitate was washed with ethanol:water (1:1) solution, centrifuged again, and the  
48 process was repeated three times. Finally, the obtained CuAsp were dissolved in  
49 deionized water and stored in a refrigerator at 4 °C.

#### 50 **Stability comparison of GA-CuAsp and CuAsp.**

51 For pH stability. GA-CuAsp and CuAsp were incubated at different pH (3-9) for  
52 6 h to assess the acid-base tolerance of GA-CuAsp and CuAsp, and then the activity  
53 was determined by the extent to which they catalysed the oxidation of 2,4-DP. The  
54 activities at other pH were compared with the activity at the optimal pH to determine  
55 the relative activities at different pH.

56 For temperature stability. The temperature stability of GA-CuAsp and CuAsp was  
57 investigated by exposing them to 25-80 °C for 60 min and then determining their  
58 activity by the extent of their catalysed oxidation of 2,4-DP. The activities at other  
59 temperatures were compared with those at 25 °C to determine the relative activities at  
60 different temperatures.

61 For salt concentration stability. The effect of ionic strength on catalytic activity  
62 was measured by mixing GA-CuAsp and CuAsp with different concentrations of NaCl  
63 (0, 50, 100, 200, 300, 400 and 500 mmol L<sup>-1</sup>) and then determining the activity based

64 on the extent to which it catalysed the oxidation of 2,4-DP.

65 For temporal stability. To investigate the temporal stability of GA-CuAsp and  
66 CuAsp, their aqueous solutions were stored at 4 °C for 15 days, and the catalytic  
67 reaction experiments were carried out every other day under their respective optimal  
68 catalytic conditions. The activity at the first day was considered as 100% for the  
69 comparison of time stability.

70

71

72

73

74

75

76

77

78

79

80

81

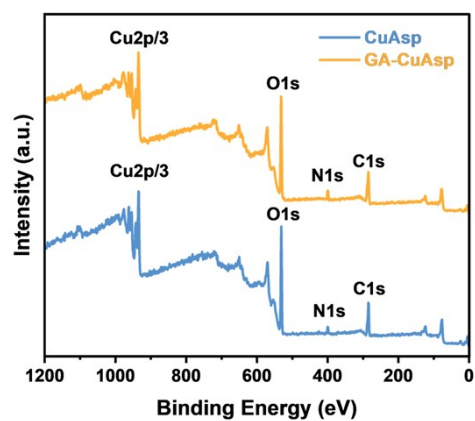

82

83 **Fig. S1** The XPS full spectrum of CuAsp and GA-CuAsp.

84

85

86

87

88

89

90

91

92

93

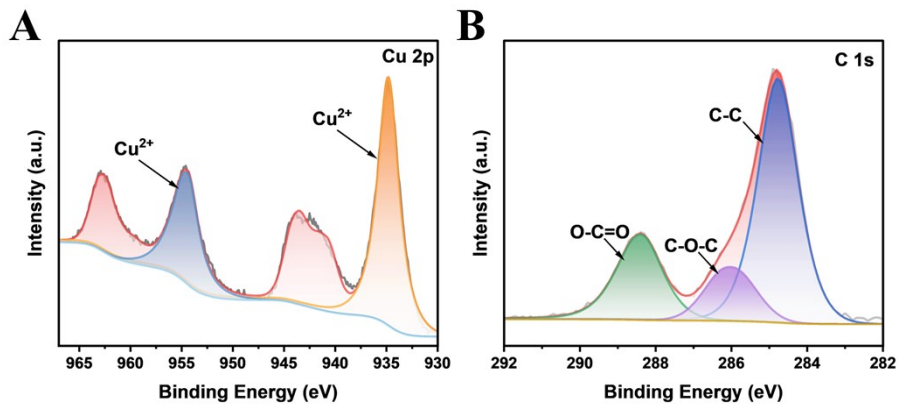

94

95 **Fig. S2** The XPS spectrum of the CuAsp with the peaks of (A) Cu 2p, (B) C 1s.

96

97

98

99

100

101

102

103

104

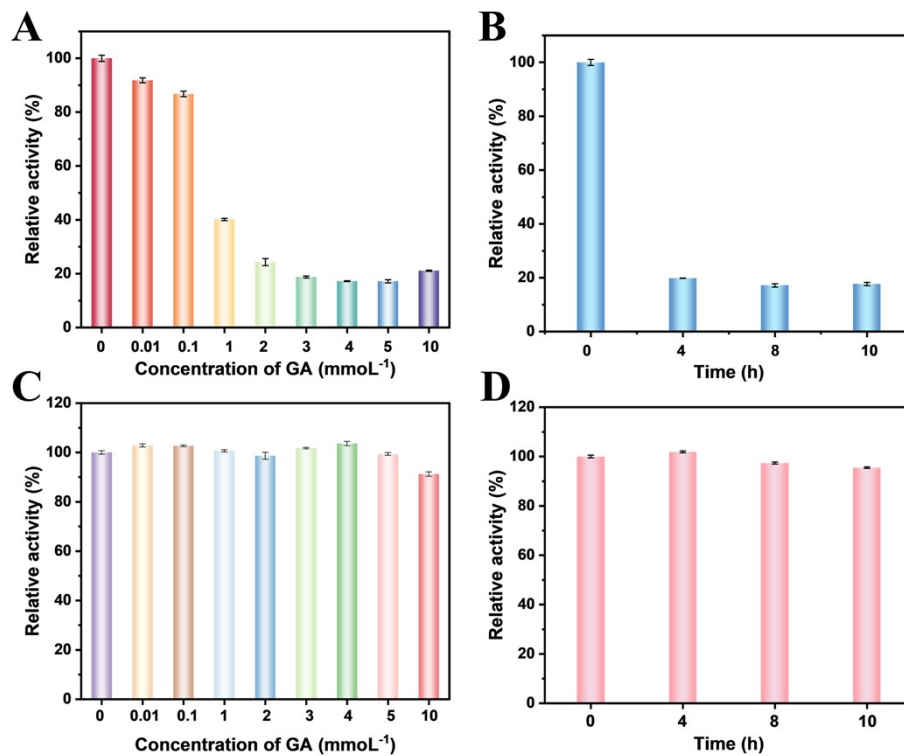

105

106 **Fig. S3 (A)** Effect of different concentrations of GA on the POD-like activity of GA-  
 107 CuAsp. **(B)** Effect on GA-CuAsp POD-like activity at different times of erosion at the  
 108 same GA concentration. **(C)** Effect of different concentrations of GA on the Lac-like  
 109 activity of GA-CuAsp. **(D)** Effect on Lac-like activity of GA-CuAsp at different times  
 110 of erosion at the same GA concentration.

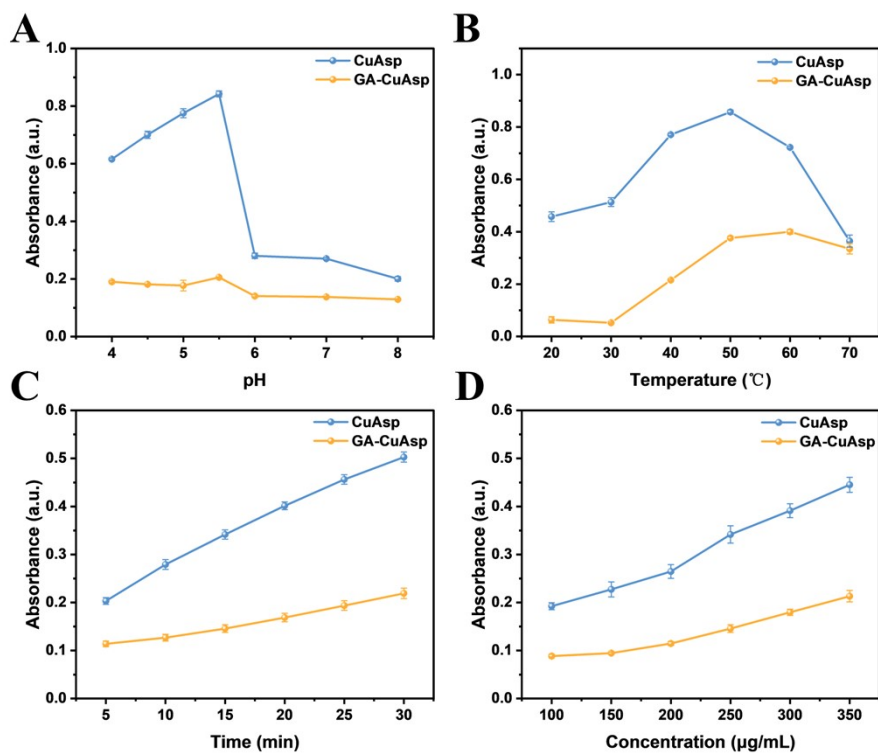

111

112 **Fig. S4** Comparison of POD-like activity reaction conditions between CuAsp and GA-

113 CuAsp. **(A)** pH. **(B)** Temperature. **(C)** Time. **(D)** Concentration.

114

115

116



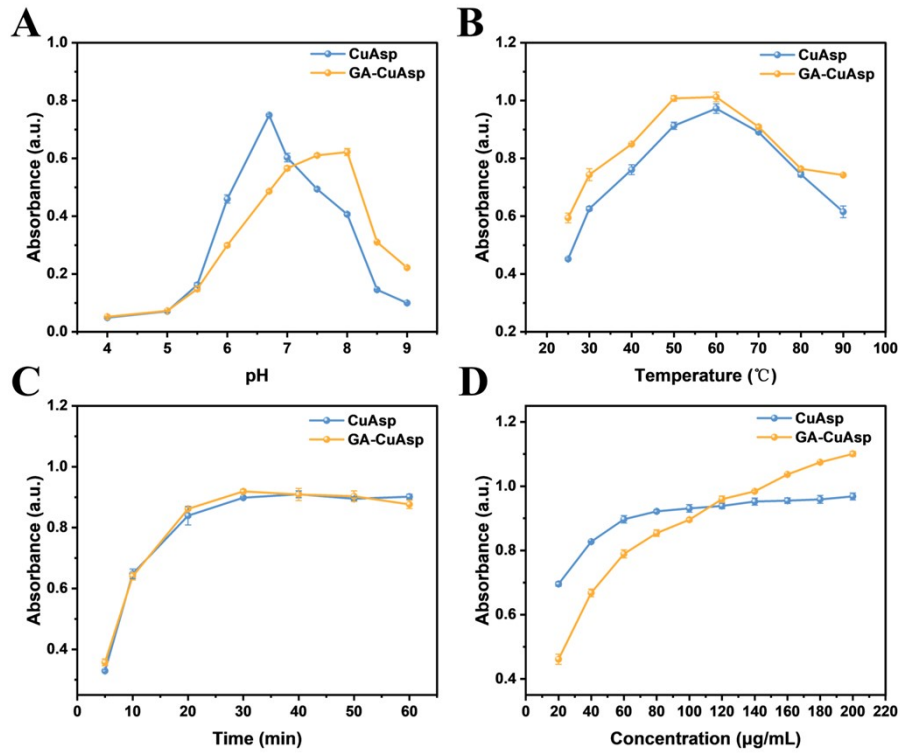

117

118 **Fig. S5** Comparison of Lac-like activity reaction conditions between CuAsp and GA-

119 CuAsp. **(A)** pH. **(B)** Temperature. **(C)** Time. **(D)** Concentration.

120

121

122

123

124

125

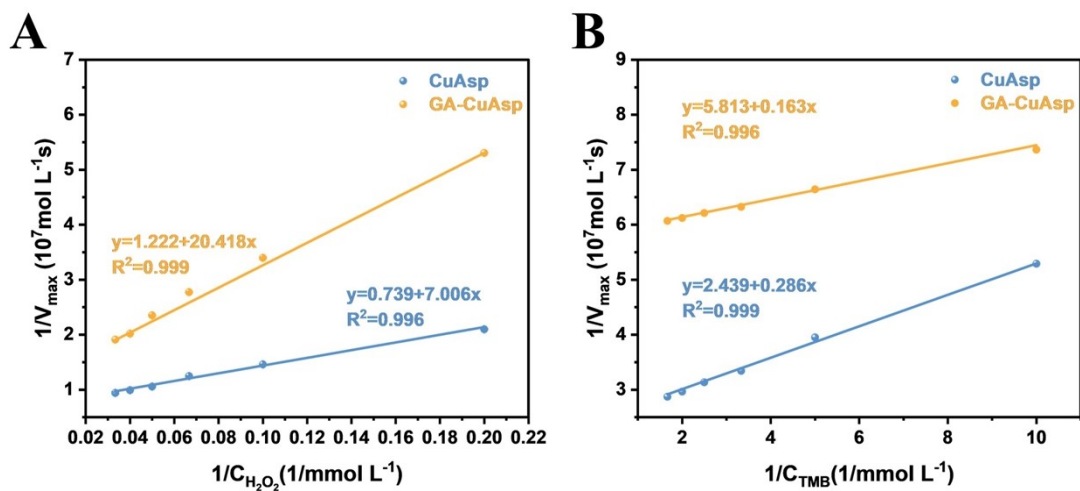

126

127 **Fig. S6** Kinetic determination of the POD-like activity of CuAsp and GA-CuAsp.

128 Lineweaver-Burk plot of reaction rate versus **(A)**  $\text{H}_2\text{O}_2$  concentrations and **(B)** TMB

129 concentrations.

130

131

132

133

134

135

136

137

138

139

140

141

142 **Table S1.** Comparison of kinetic parameters of laccase-like activity of GA-CuAsp with  
143 other catalysts.

| Catalysts  | $K_m$ (mmol L <sup>-1</sup> ) | $V_{max}$ (μmol L <sup>-1</sup> min <sup>-1</sup> ) | Reference |
|------------|-------------------------------|-----------------------------------------------------|-----------|
| CH-Cu      | 0.42                          | 7.3                                                 | [S2]      |
| Bpy-Cu     | 0.19                          | 1.48                                                | [S3]      |
| MI-Bpy-Cu  | 0.11                          | 7.72                                                | [S4]      |
| Cu-Cys NLs | 0.14                          | 1.44                                                | [S5]      |
| Laccase    | 0.147                         | 12.22                                               | [S6]      |
| CuAsp      | 0.235                         | 23.41                                               | This work |
| GA-CuAsp   | 0.066                         | 12.75                                               | This work |

144

145

146

147

148

149

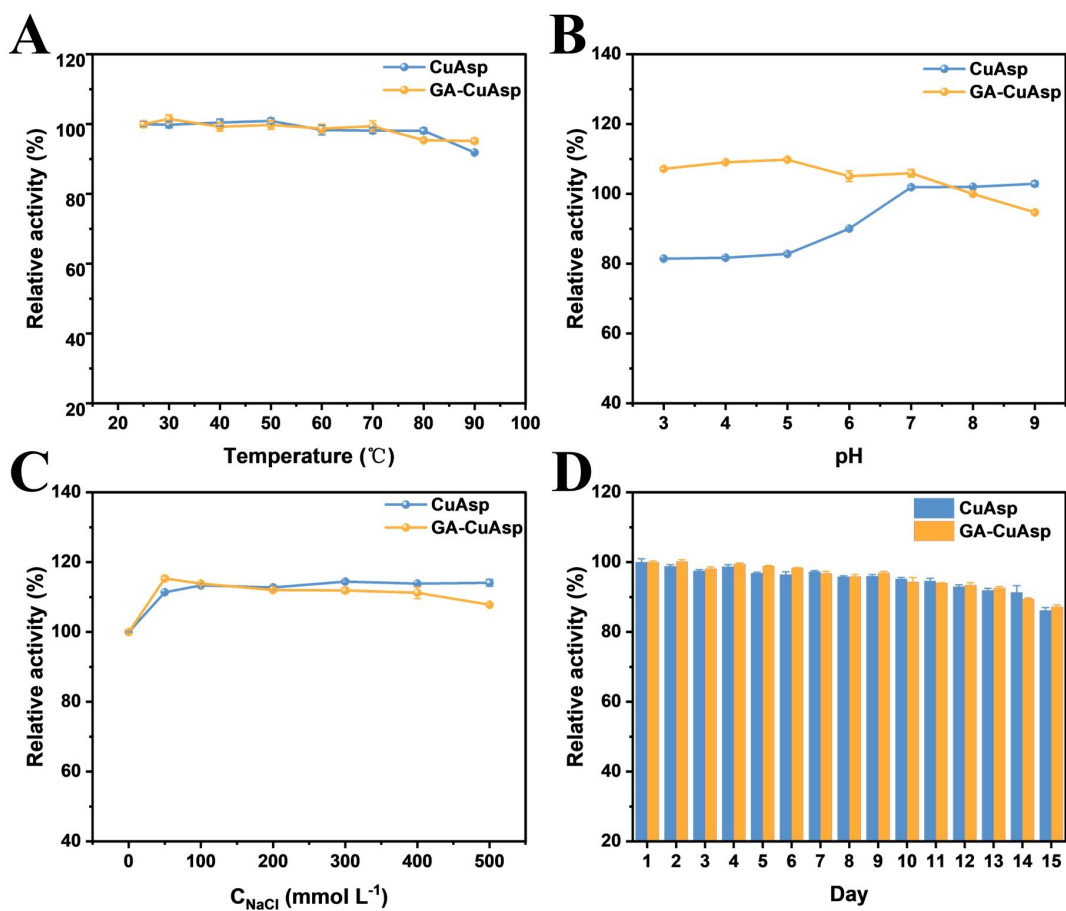

150

151 **Fig. S7** Comparison of the stability of CuAsp and GA-CuAsp. **(A)** Temperature. **(B)**

152 pH. **(C)** NaCl. **(D)** Day. Data are shown as mean  $\pm$  SD (n = 3).

153

154

155

156

157

158

159

160

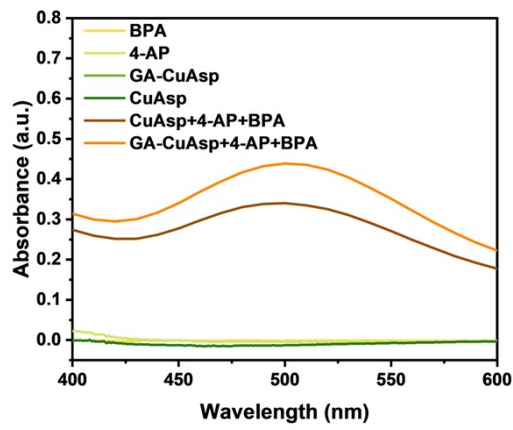

161

162 **Fig. S8** Feasibility analysis of BPA.

163

164

165

166

167

168

169

170

171

172

173

174

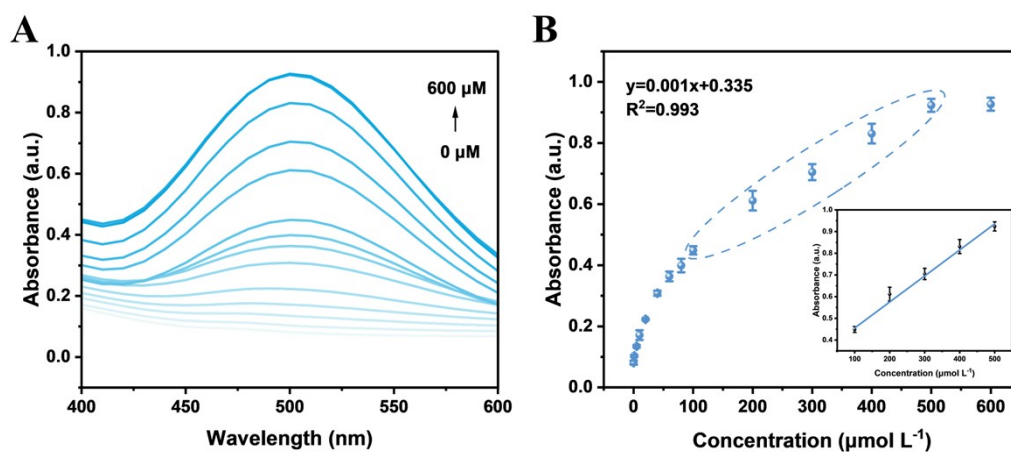

175

176 **Fig. S9 (A)** UV-Vis spectra based on CuAsp for the detection of different  
 177 concentrations of BPA. **(B)** Detection of different concentrations of BPA based on  
 178 CuAsp and the corresponding standard curves. Inset: linear relationship between  
 179 absorbance and BPA concentration (100-500  $\mu\text{mol L}^{-1}$ ). Data are shown as mean  $\pm$  SD  
 180 ( $n = 6$ ).

181

182

183

184

185

186

187

188

189

190

191

192 **Table S2.** Comparison of performance of different methods for bisphenol A detection.

| Sensor                                                  | Analyzed samples                   | Linear range ( $\mu\text{mol L}^{-1}$ ) | LOD ( $\mu\text{mol L}^{-1}$ ) | References |
|---------------------------------------------------------|------------------------------------|-----------------------------------------|--------------------------------|------------|
| CDs@Eu-AMP                                              | Water                              | 0.10-100                                | 0.02                           | [S7]       |
| PDMS@SNCM/ITO                                           | Wine                               | 1.00-100                                | 0.23                           | [S8]       |
| Mo <sub>2</sub> Ti <sub>2</sub> AlC <sub>3</sub> /MWCNT | Milk pack,<br>Plastic bottle       | 0.01-8.50                               | $2.7 \times 10^{-3}$           | [S9]       |
| TYR-TiO <sub>2</sub> -MWCNTs-<br>PDDA-Nafion/GE         | Plastic bag for<br>rice            | 0.28-45.05                              | 0.066                          | [S10]      |
| COF/GCE                                                 | Bottles                            | 0.10-50                                 | 0.02                           | [S11]      |
| RGO-Ag/PLL/ GCE                                         | Drinking water                     | 1.00-80                                 | 0.54                           | [S12]      |
| CuAsp                                                   | --                                 | 100-500                                 | 41.40                          | This work  |
| GA-CuAsp                                                | Water, Infant<br>food<br>packaging | 0-100                                   | 0.75                           | This work  |

193

194

195

196

197

198

199

200

201

202 **Supplemental references**

- 203 S1. C. Zhao, C. Shen and W. Han, *RSC Adv.*, 2015, **5**, 20386-20389.
- 204 S2. J. Wang, R. Huang, W. Qi, R. Su, B. P. Binks and Z. He, *Appl. Catal., B*, 2019,  
205 **254**, 452-462.
- 206 S3. M. Li, Y. Xie, L. Lei, H. Huang and Y. Li, *Sens. Actuators, B*, 2022, **357**,  
207 131429, DOI: 10.1016/j.snb.2022.131429.
- 208 S4. M. Li, Y. Xie, D. Song, H. Huang and Y. Li, *Talanta*, 2023, **252**, 123853, DOI:  
209 10.1016/j.talanta.2022.123853.
- 210 S5. M. Guan, M. Wang, W. Qi, R. Su and Z. He, *Front. Chem. Sci. Eng.*, 2021, **15**,  
211 310-318.
- 212 S6. L. Lei, D. Song, L. Fan, B. Liu, M. He, X. Sun, W. Xu, K. Tao, H. Huang and Y.  
213 Li, *Microchim. Acta*, 2022, **189**, 61, DOI: 10.1007/s00604-021-05160-x.
- 214 S7. Y. Li, Q. Min, Y. Wang, X. Zhuang, X. Hao, C. Tian, X. Fu and F. Luan, *RSC*  
215 *Adv.*, 2022, **12**, 7306-7312.
- 216 S8. J. Wang, J. Yu, Y. Yu, Z. Luo, G. Li and X. Lin, *Food chemistry*, 2023, **405**,  
217 134806-134806.
- 218 S9. V. Sanko, A. Senocak, S. O. Tumay, Y. Orooji, E. Demirbas and A. Khataee,  
219 *Environ. Res.*, 2022, **212**, 113071, DOI: 10.1016/j.envres.2022.113071.
- 220 S10. J. Kochana, K. Wapiennik, J. Kozak, P. Knihnicki, A. Pollap, M.  
221 Wozniakiewicz, J. Nowak and P. Koscielniak, *Talanta*, 2015, **144**, 163-170.
- 222 S11. Y.-H. Pang, Y.-Y. Huang, L. Wang, X.-F. Shen and Y.-Y. Wang,  
223 *Environmental Pollution*, 2020, **263**, 114616, DOI:



224 10.1016/j.envpol.2020.114616.

225 S12. Y. Li, H. Wang, B. Yan and H. Zhang, *J. Electroanal. Chem.*, 2017, **805**, 39-46.

226
